# Supplementary material for: Nosema ceranae parasitism impacts olfactory learning and memory and neurochemistry in honey bees (Apis mellifera)
Source: Oxford University Press journal article supplement (doi:10.1242/jeb.161489), 2017-01-01
Supplement: jeb161489supp.pdf [file jeb161489supp.pdf]

Amino acid analysis of pollen fed to all bees

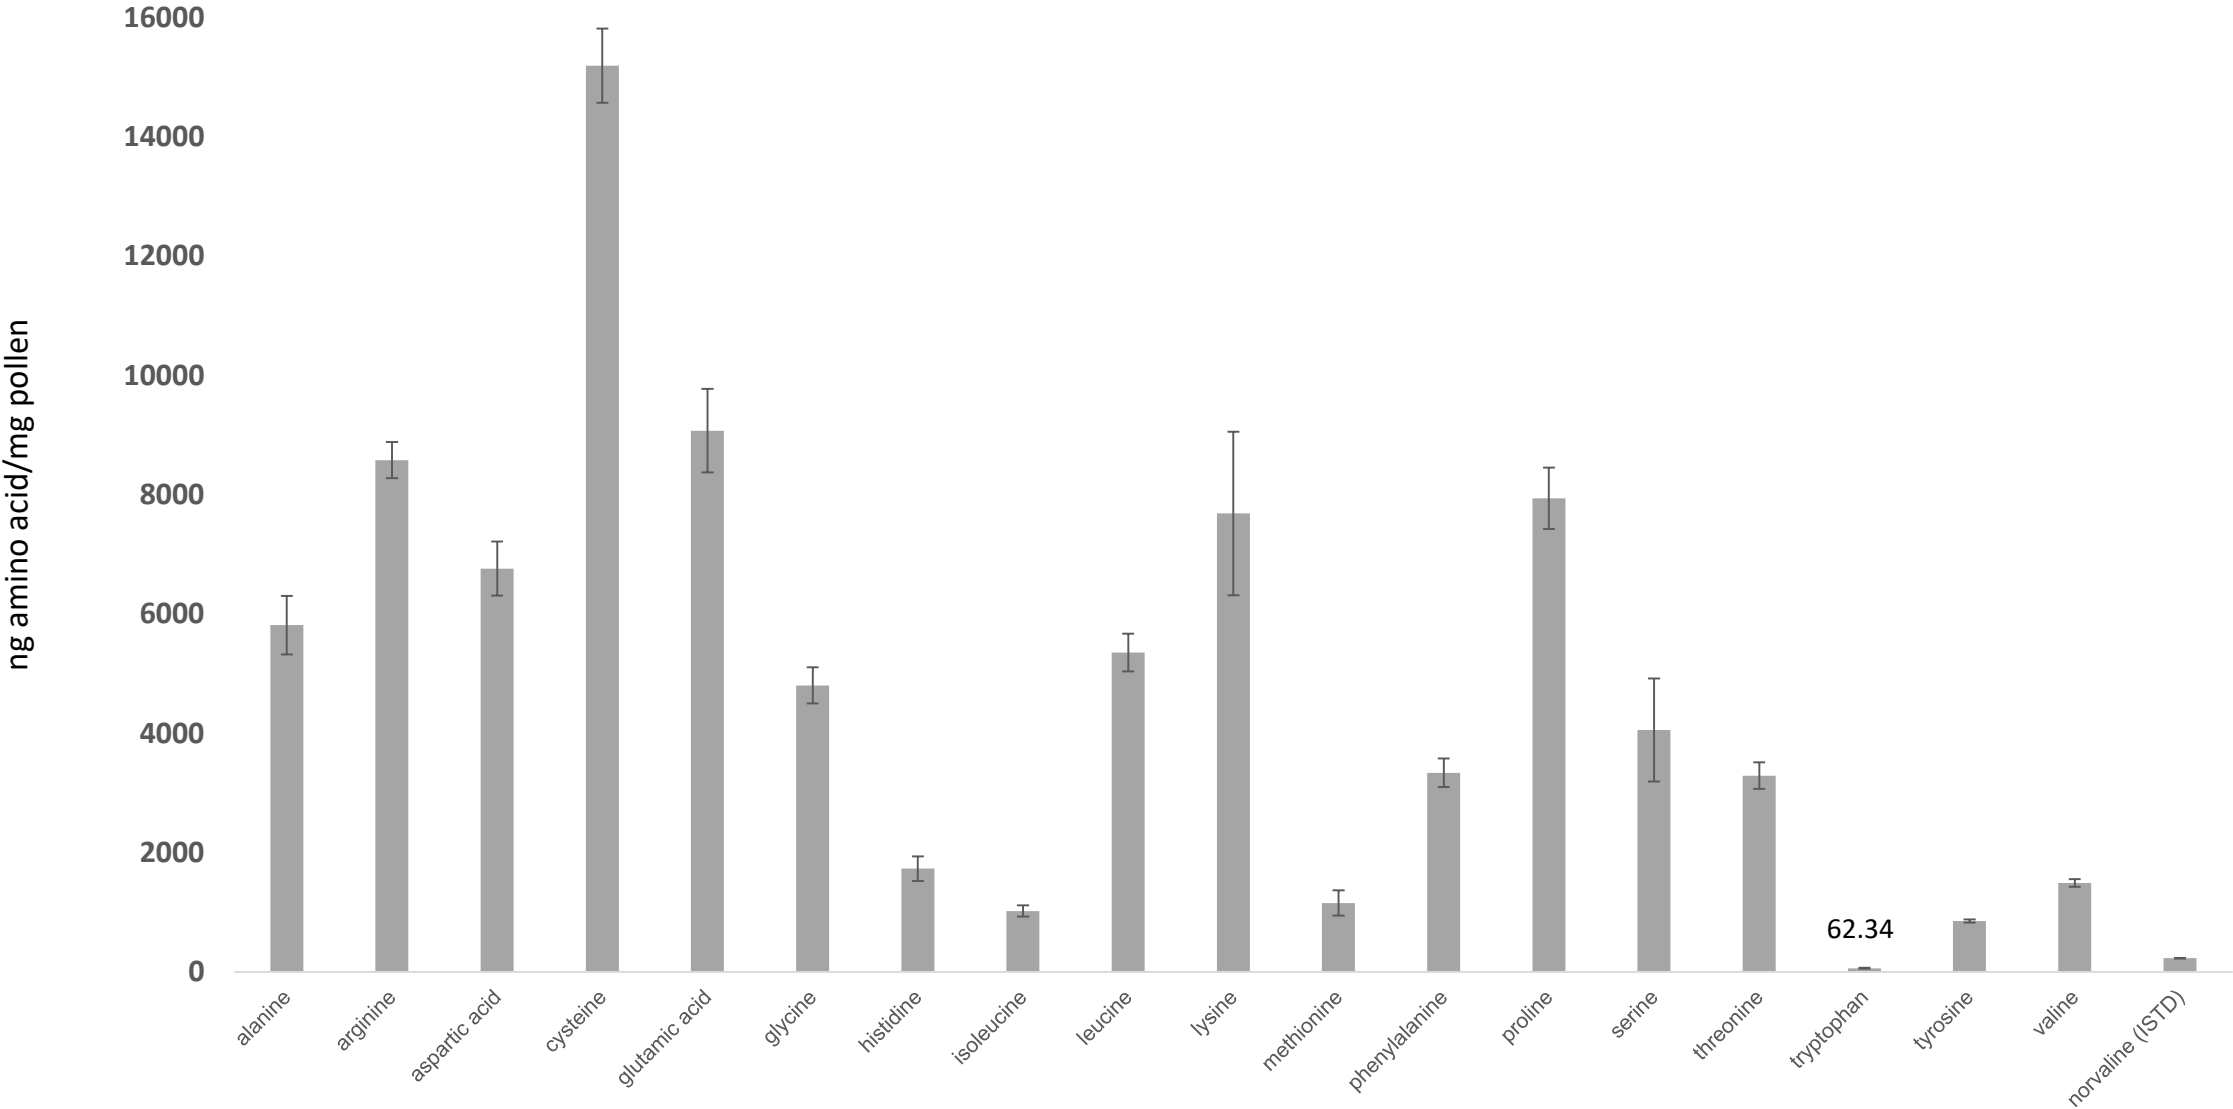

**Fig. S1. Amino acid analysis of pollen fed to all experimental bees.** Pollen was tested for amino acid composition using six samples of 10 mg. Norvaline was used as an internal standard and is not found in nature. Error bars denote s.e.m.
